# Supplementary material
Source: PubMed Central journal article supplement (PMC5818826)
Supplement: jamainternmed-177-800-s001.pdf [file jamainternmed-177-800-s001.pdf]

## Supplementary Online Content

Halpern J, Chughtai B, Ghomrawi H. Cost-Effectiveness of common diagnostic approaches for evaluation of asymptomatic microscopic hematuria [published online April 17, 2017]. *JAMA Intern Med*. doi:10.1001/jamainternmed.2017.0739

**eTable.** Incremental Cost per Cancer Detected (ICCD) For Diagnostic Strategies Among Subgroups

**eFigure.** One-Way Sensitivity Analysis

This supplementary material has been provided by the authors to give readers additional information about their work.

eTable: Incremental Cost per Cancer Detected (ICCD) For Diagnostic Strategies Among Subgroups

| <b>Strategy</b> | <b>Males</b>     |               |             | <b>Smokers</b>   |               |             | <b>Age &gt; 50</b> |               |             |
|-----------------|------------------|---------------|-------------|------------------|---------------|-------------|--------------------|---------------|-------------|
|                 | <b>Δ cancers</b> | <b>Δ cost</b> | <b>ICCD</b> | <b>Δ cancers</b> | <b>Δ cost</b> | <b>ICCD</b> | <b>Δ cancers</b>   | <b>Δ cost</b> | <b>ICCD</b> |
| No evaluation   | -                | -             | -           | -                | -             | -           | -                  | -             | -           |
| CT only         | 382              | \$9,298,200   | Dominated   | 332              | \$9,298,700   | Dominated   | 302                | \$9,299,100   | Dominated   |
| Cystoscopy only | 384              | \$2,320,200   | \$6,047     | 334              | \$2,309,000   | \$6,918     | 303                | \$2,302,200   | \$7,594     |
| US + cystoscopy | 39               | \$1,219,100   | \$31,107    | 34               | \$1,219,500   | \$35,773    | 31                 | \$1,219,700   | \$39,383    |
| CT + cystoscopy | 2                | \$8,036,100   | \$3,720,417 | 2                | \$8,036,000   | \$4,297,326 | 2                  | \$8,036,000   | \$4,727,059 |

\*Cancers detected and costs are reported as rate per 10,000 patients

CT = computed tomography; US = renal ultrasound; dominated = less effective and more expensive than another intervention;

eFigure.

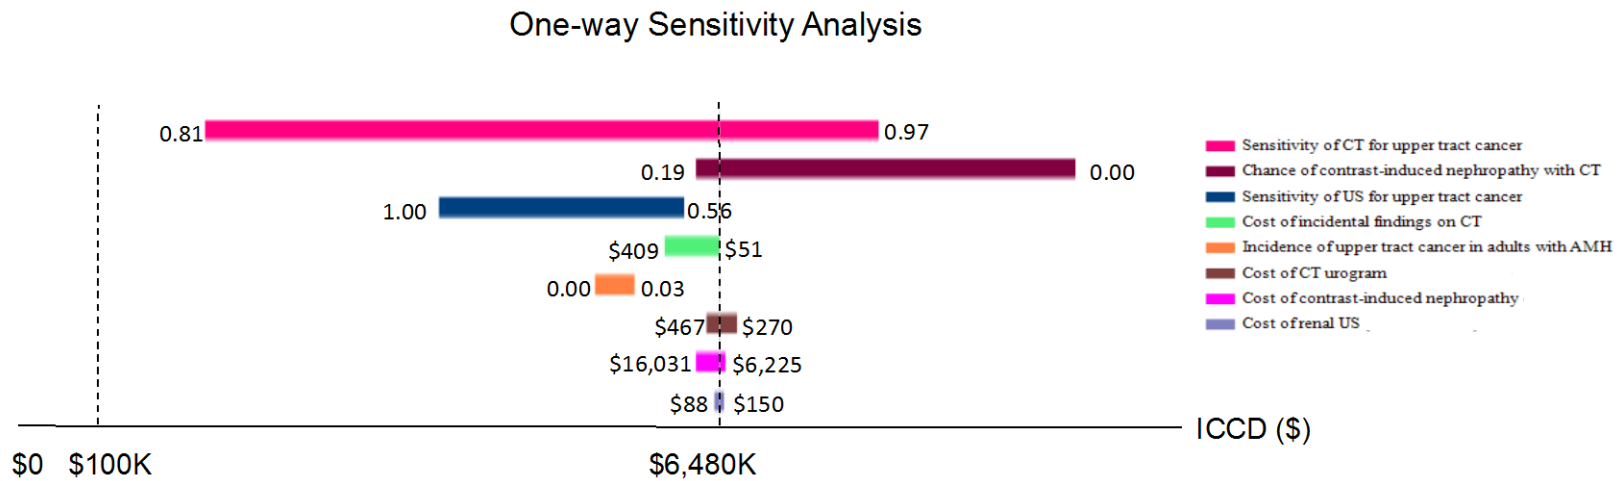

Note: US and cystoscopy remained the optimal strategy across all one-way sensitivity analysis, as ICCD for CT and cystoscopy was above the \$100K willingness-to-pay threshold throughout  
 ICCD = incremental cost per cancer detected; K = thousand

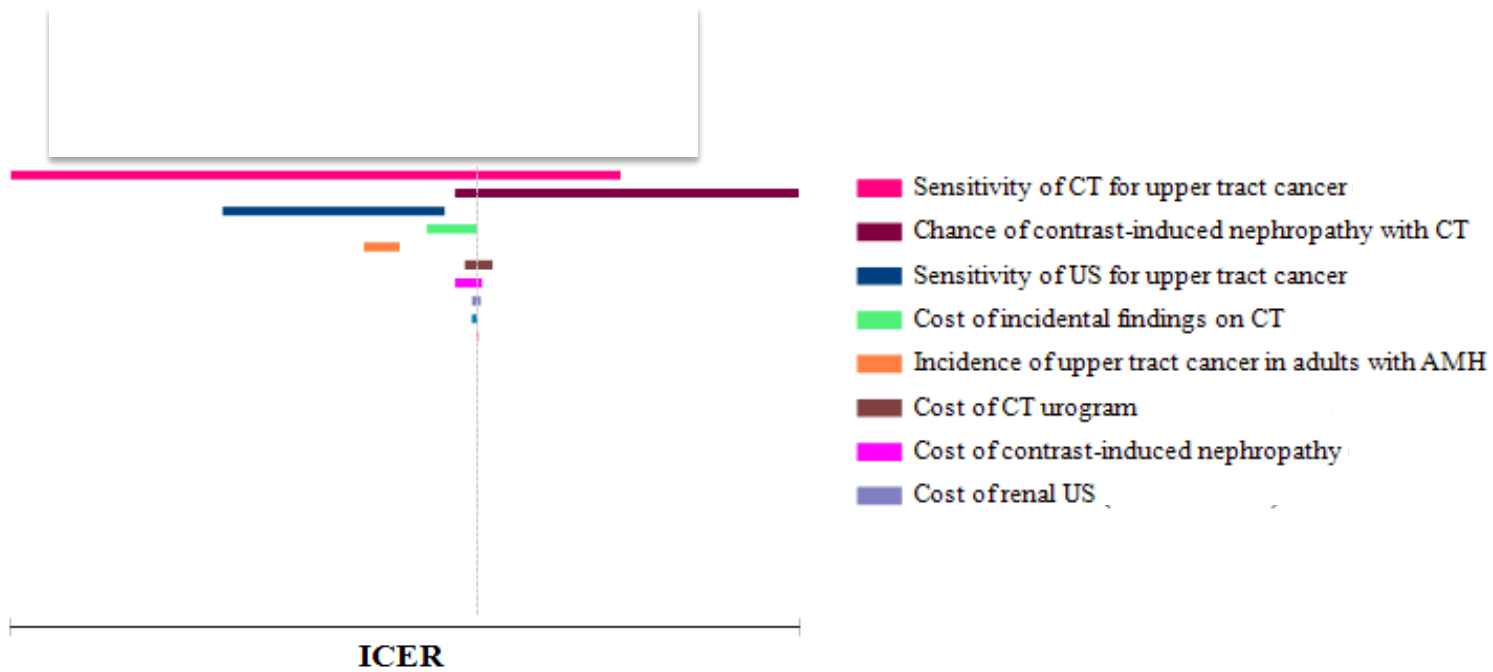

eFigure 1: Incremental cost-effectiveness ratio (ICER) tornado diagram for comparison of computed tomography (CT) and cystoscopy versus ultrasound (US) and cystoscopy
